# Supplementary material for: Association between catheter ablation of atrial fibrillation and mortality or stroke
Source: HighWire-hosted journal article supplement (doi:10.1136/heartjnl-2023-322883), 2023-09-01
Supplement: heartjnl-2023-322883supp001_data_supplement.pdf [file heartjnl-2023-322883supp001_data_supplement.pdf]

Supplementary table 1: Full baseline characteristics of all variables used for propensity-score matching

|                                                  |              | Full cohort (before propensity score matching) |                    |          |              | Propensity score matched cohorts |                    |          |              |
|--------------------------------------------------|--------------|------------------------------------------------|--------------------|----------|--------------|----------------------------------|--------------------|----------|--------------|
|                                                  |              | Controls<br>(n=48,676)                         | Cases<br>(n=5,628) | <i>P</i> | std-<br>diff | Controls<br>(n=3,955)            | Cases<br>(n=3,955) | <i>P</i> | std-<br>diff |
| <b>Demographic characteristics on index date</b> |              |                                                |                    |          |              |                                  |                    |          |              |
| Age, years                                       | mean (s.d.)  | 61.1 (10.0)                                    | 59.9 (10.0)        | <0.001   | 0.114        | 61.7 (9.5)                       | 60.9 (9.7)         | <0.001   | 0.077        |
|                                                  | median (IQR) | 63 (56-68)                                     | 61 (54-67)         |          |              | 64 (57-68)                       | 62 (55-68)         |          |              |
| Females                                          |              | 14902<br>(30.6%)                               | 1564<br>(27.8%)    | <0.001   | 0.062        | 1,182 (29.9%)                    | 1168<br>(29.5%)    | 0.731    | 0.008        |
| Year of index date                               | 2008         | 2,662<br>(5.5%)                                | 263 (4.7%)         | <0.001   | 0.200        | 155 (3.9%)                       | 166 (4.2%)         | 1.0      | 0.021        |
|                                                  | 2009         | 2,814<br>(5.8%)                                | 284 (5.0%)         |          |              | 194 (4.9%)                       | 198 (5.0%)         |          |              |
|                                                  | 2010         | 4,804<br>(9.9%)                                | 475 (8.4%)         |          |              | 312 (7.9%)                       | 316 (8.0%)         |          |              |
|                                                  | 2011         | 4,587<br>(9.4%)                                | 462 (8.2%)         |          |              | 287 (7.3%)                       | 292 (7.4%)         |          |              |
|                                                  | 2012         | 5,093<br>(10.5%)                               | 524 (9.3%)         |          |              | 376 (9.5%)                       | 369 (9.3%)         |          |              |
|                                                  | 2013         | 4,974<br>(10.2%)                               | 517 (9.2%)         |          |              | 374 (9.5%)                       | 376 (9.5%)         |          |              |
|                                                  | 2014         | 5,920<br>(12.2%)                               | 610<br>(10.8%)     |          |              | 456 (11.5%)                      | 458 (11.6%)        |          |              |
|                                                  | 2015         | 5,751<br>(11.8%)                               | 634<br>(11.3%)     |          |              | 468 (11.8%)                      | 464 (11.7%)        |          |              |
|                                                  | 2016         | 5,553<br>(11.4%)                               | 739<br>(13.1%)     |          |              | 522 (13.2%)                      | 517 (13.1%)        |          |              |
|                                                  | 2017         | 3,635<br>(7.5%)                                | 570<br>(10.1%)     |          |              | 40 (10.6%)                       | 406 (10.3%)        |          |              |

|                                                                    |                 |                            |                            |         |        |                         |                       |        |        |
|--------------------------------------------------------------------|-----------------|----------------------------|----------------------------|---------|--------|-------------------------|-----------------------|--------|--------|
|                                                                    | 2018            | 2,884<br>(5.9%)            | 550 (9.8%)                 |         |        | 392 (9.9%)              | 393 (9.9%)            |        |        |
| Education                                                          | Elementary      | 12,198<br>(25.1%)          | 822<br>(14.6%)             | <0.001  | 0.374  | 652 (16.5%)             | 657 (16.6%)           | 0.952  | 0.013  |
|                                                                    | High school     | 22,030<br>(45.3%)          | 2243<br>(39.9%)            |         |        | 1,640 (41.5%)           | 1,617<br>(40.9%)      |        |        |
|                                                                    | University      | 14,063<br>(28.9%)          | 2538<br>(45.1%)            |         |        | 1,641 (41.5%)           | 1,661<br>(42.0%)      |        |        |
|                                                                    | Unknown         | 385 (0.8%)                 | 25 (0.4%)                  |         |        | 22 (0.6%)               | 20 (0.5%)             |        |        |
| Income<br>(KSEK/year)                                              | mean (s.d.)     | 273.2<br>(1,418.6)         | 415.2<br>(934.1)           | <0.001* | -0.118 | 469.3<br>(4,842.9)      | 363.7<br>(649.8)      | 0.014* | 0.031  |
|                                                                    | median<br>(IQR) | 211.7<br>(143.9-<br>305.8) | 287.9<br>(192.8-<br>419.7) |         |        | 261.3 (178.2-<br>362.8) | 269 (179.3-<br>394.5) |        |        |
| Civil status                                                       | Alone           | 21,863<br>(44.9%)          | 2,004<br>(35.6%)           | <0.001  | 0.191  | 1,402 (35.4%)           | 1435<br>(36.3%)       | 0.439  | -0.017 |
| Born abroad                                                        |                 | 6,586<br>(13.5%)           | 480 (8.5%)                 | <0.001  | 0.160  | 352 (8.9%)              | 367 (9.3%)            | 0.557  | -0.013 |
| <b>Health care utilization during 10 years prior to index date</b> |                 |                            |                            |         |        |                         |                       |        |        |
| No. of<br>outpatients<br>visits                                    | mean (s.d.)     | 8.1 (22.6)                 | 12.1 (11.1)                | <0.001* | -0.229 | 12.2 (43.2)             | 12.0 (10.2)           | 0.347* | 0.001  |
|                                                                    | median<br>(IQR) | 4 (1-10)                   | 10 (6-15)                  |         |        | 8 (4-14)                | 10 (5-15)             |        |        |
| No. of<br>hospitalizations                                         | mean (s.d.)     | 2.9 (4.3)                  | 4.4 (5.0)                  | <0.001* | -0.314 | 4.0 (5.2)               | 4.0 (4.5)             | 0.347  | -0.001 |
|                                                                    | median<br>(IQR) | 2 (0-4)                    | 3 (5)                      |         |        | 3 (1-5)                 | 3 (1-5)               |        |        |
| No. of hospital<br>days                                            | mean (s.d.)     | 10.8 (25.9)                | 7.1 (11.0)                 | <0.001* | 0.186  | 8.0 (12.9)              | 7.6 (12.0)            | 0.032  | 0.038  |
|                                                                    | median<br>(IQR) | 3 (0-13)                   | 4 (1-9)                    |         |        | 4 (1-10)                | 4 (1-9)               |        |        |
| <b>Comorbidities prior to index date</b>                           |                 |                            |                            |         |        |                         |                       |        |        |
| Hypertension                                                       |                 | 21,002<br>(43.2%)          | 2409<br>(42.8%)            | 0.623   | 0.007  | 1,927 (48.7%)           | 1801<br>(45.5%)       | 0.005  | 0.064  |

|                                                        |  |                   |                  |        |        |               |                  |        |        |
|--------------------------------------------------------|--|-------------------|------------------|--------|--------|---------------|------------------|--------|--------|
| Hyperlipidemia                                         |  | 357 (0.7%)        | 29 (0.5%)        | 0.065  | 0.028  | 23 (0.6%)     | 23 (0.6%)        | 1.000  | 0.000  |
| COPD                                                   |  | 2,356<br>(4.8%)   | 116 (2.1%)       | <0.001 | 0.152  | 102 (2.6%)    | 91 (2.3%)        | 0.423  | 0.018  |
| Heart failure                                          |  | 8,166<br>(16.8%)  | 738<br>(13.1%)   | <0.001 | 0.103  | 619 (15.7%)   | 580 (14.7%)      | 0.221  | 0.028  |
| Ischemic heart disease                                 |  | 6,195<br>(12.7%)  | 396 (7.0%)       | <0.001 | 0.192  | 322 (8.1%)    | 316 (8.0%)       | 0.804  | 0.006  |
| Chronic kidney disease                                 |  | 1,922<br>(4.0%)   | 82 (1.5%)        | <0.001 | 0.154  | 75 (1.9%)     | 67 (1.7%)        | 0.498  | 0.015  |
| Diabetes (type 1 and 2)                                |  | 6804<br>(14.0%)   | 396 (7.0%)       | <0.001 | 0.228  | 326 (8.2%)    | 331 (8.4%)       | 0.839  | 0.005  |
| CHA <sub>2</sub> DS <sub>2</sub> -VASc                 |  | 1.6±1.5           | 1.4±1.4          | <0.001 | 0.162  | 1.6±1.3       | 1.5±1.4          | <0.001 | 0.083  |
| <b>Drug prescriptions 6 months prior to index date</b> |  |                   |                  |        |        |               |                  |        |        |
| Amiodarone                                             |  | 721 (1.5%)        | 887<br>(15.8%)   | <0.001 | -0.526 | 432 (10.9%)   | 423 (10.7%)      | 0.744  | 0.007  |
| Flecainide                                             |  | 1,887<br>(3.9%)   | 1,220<br>(21.7%) | <0.001 | -0.553 | 678 (17.4%)   | 653 (16.5%)      | 0.452  | 0.017  |
| Sotalol                                                |  | 1,424<br>(2.9%)   | 389 (6.9%)       | <0.001 | -0.185 | 274 (6.9%)    | 265 (6.7%)       | 0.688  | 0.009  |
| Dronedarone                                            |  | 774 (1.6%)        | 1,104<br>(19.6%) | <0.001 | -0.612 | 500 (12.6%)   | 540 (13.7%)      | 0.183  | -0.030 |
| Betablocker                                            |  | 27,119<br>(55.9%) | 4,051<br>(72.0%) | <0.001 | -0.340 | 2,887 (73.0%) | 2,801<br>(70.8%) | 0.031  | 0.048  |
| Calcium antagonist                                     |  | 1,179<br>(2.4%)   | 230 (4.1%)       | <0.001 | -0.094 | 157 (4.0%)    | 152 (3.8%)       | 0.772  | 0.007  |
| Loop diuretic                                          |  | 6,741<br>(13.9%)  | 477 (8.5%)       | <0.001 | 0.171  | 413 (10.4%)   | 389 (9.8%)       | 0.371  | 0.020  |
| ACEI /ARB                                              |  | 20,871<br>(42.9%) | 2,244<br>(39.9%) | <0.001 | 0.061  | 1,796 (45.4%) | 1,681<br>(42.5%) | 0.009  | 0.059  |
| Antiplatelet                                           |  | 9,824<br>(20.2%)  | 554 (9.8%)       | <0.001 | 0.293  | 335 (8.5%)    | 360 (9.1%)       | 0.321  | -0.022 |

|                                                                                                                                                                                                                                                |  |                   |                  |        |        |               |                  |       |       |
|------------------------------------------------------------------------------------------------------------------------------------------------------------------------------------------------------------------------------------------------|--|-------------------|------------------|--------|--------|---------------|------------------|-------|-------|
| NOAC                                                                                                                                                                                                                                           |  | 4,299<br>(8.8%)   | 1982<br>(35.2%)  | <0.001 | -0.671 | 1,351 (34.2%) | 1,269<br>(32.1%) | 0.050 | 0.044 |
| Warfarin                                                                                                                                                                                                                                       |  | 14,486<br>(29.8%) | 3,750<br>(66.6%) | <0.001 | -0.793 | 2562 (64.8%)  | 2,556<br>(64.6%) | 0.888 | 0.003 |
| Digoxin                                                                                                                                                                                                                                        |  | 3,965<br>(8.2%)   | 328 (5.8%)       | <0.001 | 0.091  | 295 (7.5%)    | 272 (6.9%)       | 0.316 | 0.023 |
| *Man-Whitney U test. ACE = angiotensin receptor enzyme inhibitor; ARB = angiotensin receptor blockers; COPD = chronic obstructive pulmonary disease; NOAC = non-vitamin K antagonist oral anticoagulants; std-diff = standardised differences. |  |                   |                  |        |        |               |                  |       |       |

Supplementary table 2: Oral anticoagulation during the study period

| Year    | Full cohort (before propensity score matching) |       |          |       | Propensity score matched cohorts |       |          |       |               |          |
|---------|------------------------------------------------|-------|----------|-------|----------------------------------|-------|----------|-------|---------------|----------|
|         | Controls                                       |       | Cases    |       | Controls                         |       | Cases    |       | Warfarin/NOAC |          |
|         | Warfarin                                       | NOAC  | Warfarin | NOAC  | Warfarin                         | NOAC  | Warfarin | NOAC  | <i>P</i>      | std-diff |
| 2008    | 16.9%                                          | 0%    | 88.2%    | 0%    | 71.6%                            | 0%    | 86.1%    | 0%    | 0.001         | -0.361   |
| 2009    | 20.9%                                          | 0%    | 68.8%    | 0%    | 71.7%                            | 0.3%  | 69.4%    | 0%    | 0.457         | 0.056    |
| 2010    | 23.9%                                          | 0.1%  | 65.8%    | 0%    | 70.4%                            | 0%    | 65.8%    | 0%    | 0.072         | 0.099    |
| 2011    | 28.8%                                          | 0.2%  | 61.2%    | 0.2%  | 71.1%                            | 0.3%  | 62.2%    | 0.2%  | <0.001        | 0.191    |
| 2012    | 34.4%                                          | 1.5%  | 57.7%    | 3.1%  | 70.6%                            | 3.1%  | 59.2%    | 3.2%  | <0.001        | 0.246    |
| 2013    | 39.6%                                          | 5.2%  | 53.3%    | 6.3%  | 67.7%                            | 7.9%  | 56.7%    | 5.8%  | <0.001        | 0.288    |
| 2014    | 38.0%                                          | 9.1%  | 48.5%    | 13.0% | 62.7%                            | 15.5% | 52.2%    | 12.2% | <0.001        | 0.309    |
| 2015    | 35.0%                                          | 14.4% | 41.0%    | 21.7% | 53.2%                            | 25.2% | 44.2%    | 20.9% | <0.001        | 0.296    |
| 2016    | 31.9%                                          | 20.2% | 30.7%    | 32.0% | 45.3%                            | 34.6% | 33.4%    | 31.0% | <0.001        | 0.352    |
| 2017    | 29.1%                                          | 25.9% | 23.3%    | 40.0% | 38.7%                            | 43.1% | 25.8%    | 39.4% | <0.001        | 0.382    |
| 2018    | 25.9%                                          | 31.7% | 19.3%    | 45.8% | 32.0%                            | 51.3% | 21.6%    | 45.8% | <0.001        | 0.375    |
| F/U end | 26.2%                                          | 29.3% | 20.0%    | 45.0% | 33.1%                            | 49.5% | 22.4%    | 44.8% | <0.001        | 0.360    |

Proportion of patients on oral anticoagulation as per pharmacy dispense records. Data is shown for the enrolled patients per year of the study period and at the end of follow-up (F/U) for all patients. NOAC = non-vitamin K antagonist oral anticoagulants; std-diff = standardised differences.

**Supplementary table 3: Primary and secondary clinical outcomes in patients with atrial fibrillation receiving catheter ablation versus controls**

|                                                                                                                                                                                                                                                                                                                                                                                      | Full cohort before propensity score matching<br>(n=54,311) |                           |          | Propensity score matched cohorts (n=7,910) |                           |          |
|--------------------------------------------------------------------------------------------------------------------------------------------------------------------------------------------------------------------------------------------------------------------------------------------------------------------------------------------------------------------------------------|------------------------------------------------------------|---------------------------|----------|--------------------------------------------|---------------------------|----------|
|                                                                                                                                                                                                                                                                                                                                                                                      | No. events                                                 | Hazard ratio*<br>(95% CI) | <i>P</i> | No. events                                 | Hazard ratio*<br>(95% CI) | <i>P</i> |
| <b>Primary outcome</b>                                                                                                                                                                                                                                                                                                                                                               |                                                            |                           |          |                                            |                           |          |
| Combined all cause-mortality or stroke                                                                                                                                                                                                                                                                                                                                               | 6,728                                                      | 0.30<br>(0.26 – 0.34)     | <0.001   | 466                                        | 0.55***<br>(0.46 – 0.67)  | <0.001   |
| <b>Secondary outcomes</b>                                                                                                                                                                                                                                                                                                                                                            |                                                            |                           |          |                                            |                           |          |
| All-cause mortality                                                                                                                                                                                                                                                                                                                                                                  | 5,503                                                      | 0.27<br>(0.23 – 0.31)     | <0.001   | 363                                        | 0.47***<br>(0.39 – 0.60)  | <0.001   |
| CV-mortality                                                                                                                                                                                                                                                                                                                                                                         | 2,583                                                      | 0.25<br>(0.20 – 0.32)     | <0.001   | 177                                        | 0.41***<br>(0.29 – 0.57)  | <0.001   |
| Stroke                                                                                                                                                                                                                                                                                                                                                                               | 1,670                                                      | 0.38<br>(0.30 – 0.48)     | <0.001   | 128                                        | 0.74****<br>(0.52 – 1.05) | 0.095    |
| Heart Failure**                                                                                                                                                                                                                                                                                                                                                                      | 3,456                                                      | 0.47 (0.41 - 0.55)        | <0.001   | 280                                        | 0.73 (0.57 – 0.92)***     | 0.009    |
| *Hazard ratio using non-catheter ablation as the reference. **Excludes patients with a heart failure diagnosis prior to inclusion (full cohort n=45,402 and propensity score matched cohort n=6,544). ***Cox regression of propensity score matched cohort with covariates ****Using death as a confounding competing risk to stroke. CI = confidence interval; CV = cardiovascular. |                                                            |                           |          |                                            |                           |          |
